# Supplementary material for: Multicentre, prospective observational study of the correlation between the Glasgow Admission Prediction Score and adverse outcomes
Source: PubMed Central journal article supplement — BMJ Open. 2019 Aug 10;9(8):e026599. doi: 10.1136/bmjopen-2018-026599 (PMC6701614; doi:10.1136/bmjopen-2018-026599), 2019-08-10
Supplement: bmjopen-2018-026599supp001.pdf [file bmjopen-2018-026599supp001.pdf]

## Appendix 1 – The National early warning score (31)

|          | Score                                                        |        |          |            |             |             |           |         |
|----------|--------------------------------------------------------------|--------|----------|------------|-------------|-------------|-----------|---------|
|          |                                                              | 3      | 2        | 1          | 0           | 1           | 2         | 3       |
| Variable | Respiration rate                                             | ≤ 8    |          | 9 – 11     | 12 – 20     |             | 21-24     | ≥ 25    |
|          | Oxygen saturations                                           | ≤ 91   | 92 – 93  | 94 – 95    | ≥ 96        |             |           |         |
|          | Any supplemental oxygen?                                     |        | Yes      |            | No          |             |           |         |
|          | Temperature                                                  | ≤ 35.0 |          | 35.1 -36.0 | 36.1 - 38.0 | 38.1 - 39.0 | ≥ 39.1    |         |
|          | Systolic blood pressure                                      | ≤ 90   | 91 - 100 | 101 - 110  | 111 - 219   |             |           | ≥ 220   |
|          | Heart rate                                                   | ≤ 40   |          | 41 - 50    | 51 - 90     | 91 - 110    | 111 - 130 | ≥ 131   |
|          | Level of consciousness<br>(alert, voice, pain, unresponsive) |        |          |            | A           |             |           | V, P, U |

## Appendix 2 – The Manchester triage system (32)

| Triage Category | Name        | Colour | Time to be Seen |
|-----------------|-------------|--------|-----------------|
| 1               | Immediate   | Red    | 0 minutes       |
| 2               | Very Urgent | Orange | 10 minutes      |
| 3               | Urgent      | Yellow | 60 minutes      |
| 4               | Standard    | Green  | 120 minutes     |
| 5               | Non-Urgent  | Blue   | 240 minutes     |

The Manchester triage system consists of an algorithm that utilises 52 different flowchart diagrams, each of which is specific to a presenting complaint, for example chest pain or head injury. These flowcharts each have six key discriminators assigned to them, for example: time of onset, temperature, haemorrhage, pain, level of consciousness or threat to life. When a patient presents to the emergency department, the member of staff triaging the patient will assign the patient's primary complaints to the algorithm, then the final triage category will be determined using the outcomes from the algorithm and appropriate flow chart, along with fixed rules regarding the patient's vital signs measurements
